# Supplementary material
Source: PubMed Central journal article supplement (PMC6092676)
Supplement: EMBJ-37-e99473-s006.pdf [file EMBJ-37-e99473-s006.pdf]

**Figure 1C**

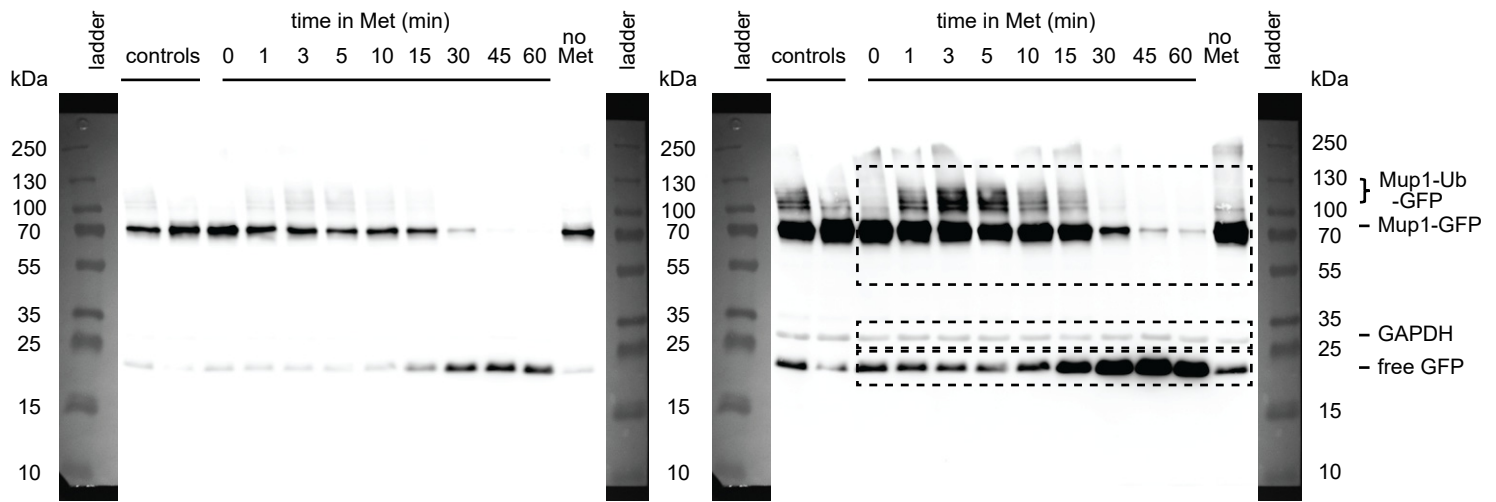

detected with anti-GFP and anti-GAPDH

Contrast for blots in the manuscript was adjusted individually for each block (dotted lines)

**Figure 1E**

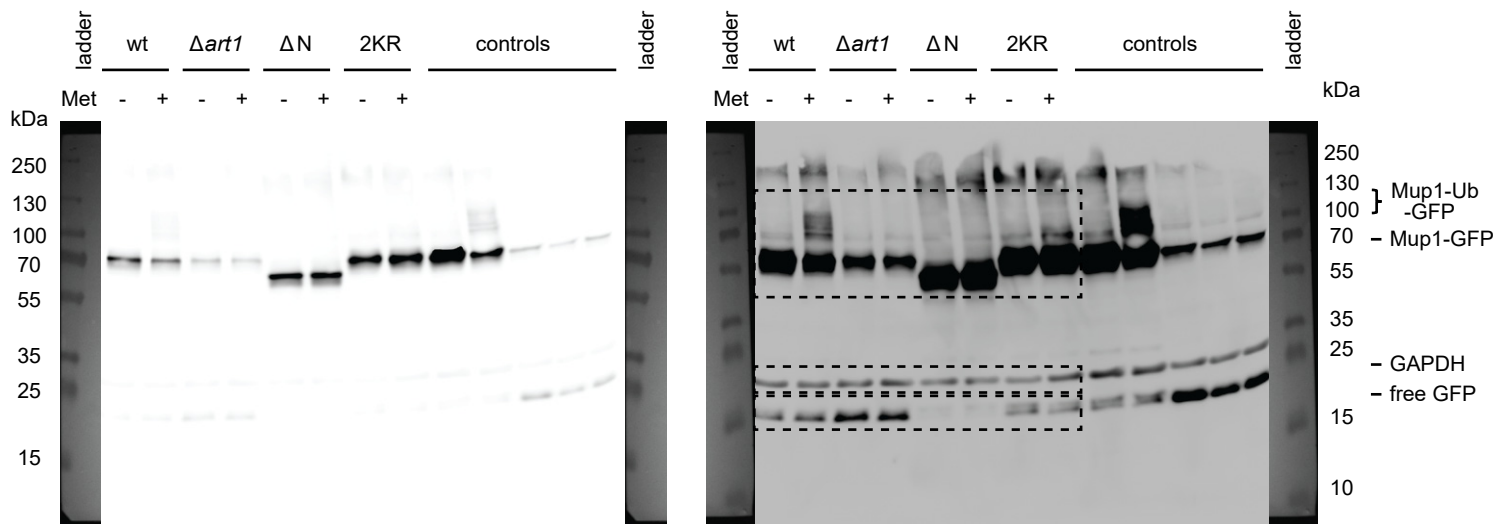

detected with anti-GFP and anti-GAPDH

Contrast for blots in the manuscript was adjusted individually for each block (dotted lines)
